# Supplementary material for: FastProtein—an automated software for in silico proteomic analysis
Source: PeerJ. 2024 Oct 31;12:e18309. doi: 10.7717/peerj.18309 (PMC11531748; doi:10.7717/peerj.18309)
Supplement: Supplemental Information 1 [file peerj-12-18309-s001.xlsx]

## Sheet: Suppl Material 1
File	Purpose
output.[xls, odf, csv, tsv, txt, sep]	Individual information of each protein
output.md	Summary in Markdown containing totalization, charts, GO, subcellular localization, and the first ten proteins
summary.txt	Summary containing information such as totalization, subcellular localization, ER retentions domain, and N-glycosylation domains
summary.json	File containing the totalizations and all individual protein information
raw/membranes.txt	File containing proteins with at least one membrane evidence, and indication of the type of evidence
raw/membrane.fasta	FASTA file containing proteins with at least one membrane evidence
raw/ignored.fasta	FASTA file containing ignored proteins
go-[C, F, P].txt	File containing GO totalization by GO-Term
console.log	Run output
wego.txt	File in native WEGO format, it can be loaded at https://wego.genomics.cn
image/	Directory containing a histogram of molecular mass and isoelectric point integrated with a scatter plot and bar chart of subcellular localization predicted via WoLF PSORT (300 DPI available)
raw/	Directory containing all raw data generated using third-party software
