# Supplementary material for: FastProtein—an automated software for in silico proteomic analysis
Source: PeerJ. 2024 Oct 31;12:e18309. doi: 10.7717/peerj.18309 (PMC11531748; doi:10.7717/peerj.18309)
Supplement: Supplemental Information 2 [file peerj-12-18309-s002.xlsx]

## Sheet: Suppl Material 2
Software	Version	Executable / Script	Command Line
DIAMOND	2.0.7	diamond	diamond blastp --ultra-sensitive --query $INPUT --db $DIAMOND_DB --out $OUTPUT --outfmt 6 qseqid sseqid pident qcovhsp positive evalue bitscore sseqid stitle
InterProScan	5.61-93.0	interproscan.sh	interproscan.sh -i $INPUT -o $OUTPUT -f tsv --goterms -T $TEMP_DIR
Phobius	1.01	phobius.pl	phobius.pl -short $INPUT > $OUTPUT
PredGPI	202001	predgpi.py	predgpi.py -f $INPUT -o $OUTPUT
SignalP	5.0b	signalp	signalp -fasta $INPUT -org $ORGANISM -format short -stdout > $OUTPUT
TMHMM	2.0c	tmhmm	tmhmm $INPUT > $OUTPUT
WoLF PSORT	0.1	runWolfPsortSummary	runWolfPsortSummary $ORGANISM < $INPUT > $OUTPUT
